# Supplementary material for: Building climate resilience, social sustainability and equity in global fisheries
Source: Research Square preprint supplement (doi:10.21203/rs.3.rs-2230749/v1), 2022-11-22
Supplement: Supplementary file 1 [file 8c3342edb94da2a807229889.xlsx]

## Sheet: Status quo (FAO)
	Indicator	Landings	Landings Value	Co2-eq
	Units	Tonnes	USD$ (2010)	Tonnes
	Time Series	Av. (2011-2018)	Av. (2011-2018)	Av. (2011-2018)
	Price Co2-eq	Status quo	Status quo	Status quo
Fao_Area
Antarctic and Southern Indian Ocean		14468	9.49875e+07	20667.4
Artic Sea		854.726	2.59673e+06	1217.6
Atlantic Antarctic		238882	1.10887e+09	339850
Atlantic Eastern Central		8.39471e+06	1.3622e+10	1.27913e+07
Atlantic Northeast		8.88328e+06	1.27792e+10	1.38399e+07
Atlantic Southeast		1.99117e+06	3.46782e+09	3.0174e+06
Atlantic Southwest		2.36273e+06	6.57175e+09	3.5036e+06
Atlantic Western Central		2.05246e+06	5.25761e+09	3.11883e+06
Indian Ocean Eastern		7.88338e+06	1.34096e+10	1.17166e+07
Indian Ocean Western		5.33559e+06	9.37129e+09	8.01464e+06
Mediterranean and Black Sea		2.04517e+06	4.19377e+09	3.2087e+06
Northwest Atlantic		2.05774e+06	8.32089e+09	3.03762e+06
Pacific Antarctic		3452.28	1.98202e+07	4912.87
Pacific Eastern Central		2.64614e+06	7.93452e+09	4.12031e+06
Pacific Northeast		2.36656e+06	2.81564e+09	3.44655e+06
Pacific Northwest		2.47019e+07	7.63317e+10	3.58237e+07
Pacific Southeast		1.86048e+07	2.26927e+10	3.00876e+07
Pacific Southwest		573945	1.17782e+09	860650
Pacific Western Central		1.5712e+07	3.33128e+10	2.36301e+07
Total		1.05869e+08	2.22485e+11	1.60584e+08

## Sheet: Mechanism (FAO)
	Indicator	Landings removals				Ad. Co2-eq seq.	Ad. Co2-eq seq.	Ad. Co2-eq seq.	Ad. Co2-eq seq.	Landings removals				Ad. Co2-eq seq.	Ad. Co2-eq seq.	Ad. Co2-eq seq.	Ad. Co2-eq seq.	Landings removals				Ad. Co2-eq seq.	Ad. Co2-eq seq.	Ad. Co2-eq seq.	Ad. Co2-eq seq.
	Units	tonnes	tonnes	tonnes	tonnes	tonnes	tonnes	tonnes	tonnes	tonnes	tonnes	tonnes	tonnes	tonnes	tonnes	tonnes	tonnes	tonnes	tonnes	tonnes	tonnes	tonnes	tonnes	tonnes	tonnes
	Factor	0.14	0.14	0.14	0.14	0.14	0.14	0.14	0.14	0.33	0.33	0.33	0.33	0.33	0.33	0.33	0.33	1	1	1	1	1	1	1	1
	Price Co2-eq	66	165	203	543	66	165	203	543	66	165	203	543	66	165	203	543	66	165	203	543	66	165	203	543
Fao_Area
Antarctic and Southern Indian Ocean		38.117	589.378	854	5701.77	54.2278	868.321	1265.29	8195.94	0	38.117	38.117	1148.57	0	54.2278	54.2278	1716.21	0	0	0	38.117	0	0	0	54.2278
Artic Sea		0	4.23352e-05	2.14716	13.9468	0	6.02288e-05	3.05469	19.8416	0	4.23351e-05	2.14716	13.9468	0	6.02287e-05	3.05469	19.8416	0	0	2.14712	13.9468	0	0	3.05463	19.8416
Atlantic Antarctic		64179.4	64401.1	69796.2	90808	91306	91621.3	99297.1	129190	0.0437142	64179.7	64184.3	71046.1	0.0621907	91306.3	91312.8	101075	0.00246417	0.00246417	0.0437142	64179.7	0.00350569	0.00350569	0.0621907	91306.3
Atlantic Eastern Central		2.04069e+06	3.7024e+06	3.96244e+06	6.96113e+06	3.31951e+06	5.79484e+06	6.18284e+06	1.06987e+07	129178	2.2067e+06	2.61385e+06	5.33914e+06	200821	3.57806e+06	4.19747e+06	8.35765e+06	111593	123612	181099	3.44914e+06	171151	191102	287710	5.58478e+06
Atlantic Northeast		3.03211e+06	6.33409e+06	7.00669e+06	8.15306e+06	4.75248e+06	9.96807e+06	1.10058e+07	1.27458e+07	1.5815e+06	3.33881e+06	3.96868e+06	7.4499e+06	2.47405e+06	5.26561e+06	6.29749e+06	1.1685e+07	669747	1.10614e+06	1.61793e+06	3.64252e+06	1.01399e+06	1.70295e+06	2.53319e+06	5.75804e+06
Atlantic Southeast		376894	1.16431e+06	1.2579e+06	1.77605e+06	611592	1.81929e+06	1.95311e+06	2.69785e+06	2765.68	477880	688924	1.43371e+06	4331.72	780334	1.10609e+06	2.20475e+06	2372.89	2766.94	2766.94	615340	3772.91	4333.5	4333.5	997735
Atlantic Southwest		82204.8	948542	1.18075e+06	1.64091e+06	120328	1.4464e+06	1.79001e+06	2.46112e+06	72183.9	112656	219455	1.29392e+06	104047	171509	331732	1.96124e+06	51489.7	72183.7	72183.9	148286	74606.6	104047	104047	230085
Atlantic Western Central		81096.1	802698	810792	1.0428e+06	116815	1.29915e+06	1.31106e+06	1.64653e+06	79400.5	88449.9	255587	878167	114171	127307	407821	1.41152e+06	60019.3	86525	86747.1	143292	86545.2	124329	124698	209772
Indian Ocean Eastern		1.28039e+06	3.74571e+06	4.1974e+06	6.14675e+06	1.95216e+06	5.58766e+06	6.25955e+06	9.16484e+06	167432	1.51228e+06	2.19758e+06	5.42602e+06	268995	2.29996e+06	3.32637e+06	8.10532e+06	30295.6	164676	291275	2.86818e+06	43201.3	268935	475008	4.36053e+06
Indian Ocean Western		839921	1.82287e+06	2.05855e+06	3.57915e+06	1.31158e+06	2.7486e+06	3.09847e+06	5.40593e+06	152510	1.05152e+06	1.22117e+06	3.03519e+06	238796	1.62961e+06	1.88521e+06	4.60425e+06	69124.3	137550	241041	1.98948e+06	99710.4	214503	387232	3.09143e+06
Mediterranean and Black Sea		581530	1.13274e+06	1.20406e+06	1.62517e+06	947094	1.84145e+06	1.95623e+06	2.59397e+06	143747	635091	908538	1.4243e+06	229818	1.03396e+06	1.48003e+06	2.29327e+06	26196.7	116507	153088	853975	38546.8	182484	243245	1.37416e+06
Northwest Atlantic		468871	636000	780387	1.2524e+06	739448	984481	1.20199e+06	1.8855e+06	288848	479280	533238	845315	440060	756371	845467	1.30338e+06	169825	248732	388522	565694	244975	374356	607019	899951
Pacific Antarctic		79.2512	301.549	345.009	1541.04	112.888	429.707	491.791	2193.82	0.679852	79.6306	82.9559	501.191	0.967203	113.428	118.222	714.46	0	0	0.679852	80.0096	0	0	0.967203	113.97
Pacific Eastern Central		550256	917755	934192	1.51921e+06	913437	1.49363e+06	1.51874e+06	2.42434e+06	43511.6	683603	766595	1.1135e+06	69104.4	1.13124e+06	1.2646e+06	1.77617e+06	32078	42611	45966.9	858973	50449.2	67655.9	72613.6	1.38682e+06
Pacific Northeast		1.23808e+06	1.64061e+06	1.79287e+06	2.11665e+06	1.81272e+06	2.38718e+06	2.60392e+06	3.08889e+06	353224	1.25182e+06	1.29479e+06	1.97922e+06	536793	1.83229e+06	1.89348e+06	2.8839e+06	130897	287017	370488	1.45165e+06	186223	433303	561354	2.13146e+06
Pacific Northwest		2.24377e+06	6.3883e+06	7.34865e+06	1.62192e+07	3.23498e+06	9.35912e+06	1.07383e+07	2.35759e+07	122686	2.65222e+06	3.69546e+06	9.91467e+06	174933	3.85104e+06	5.37484e+06	1.44607e+07	62775.6	121239	129813	3.02605e+06	89700.5	172875	185073	4.4314e+06
Pacific Southeast		2.3366e+06	1.33105e+07	1.37147e+07	1.49879e+07	3.91168e+06	2.2066e+07	2.26758e+07	2.46417e+07	2.15583e+06	4.15852e+06	9.4146e+06	1.42426e+07	3.62752e+06	6.91648e+06	1.56895e+07	2.34728e+07	10689.5	2.98681e+06	3.1036e+06	4.69874e+06	17461.1	4.97448e+06	5.14065e+06	7.72789e+06
Pacific Southwest		155990	270638	297138	486798	237235	405984	444433	729841	33295.6	182553	231960	381956	48400.7	276843	348279	573317	895.455	23967.6	48051	262700	1365.76	34346.3	69665.5	399435
Pacific Western Central		1.65029e+06	6.93155e+06	8.47957e+06	1.20324e+07	2.60772e+06	1.05324e+07	1.27594e+07	1.81232e+07	141018	1.8504e+06	3.45136e+06	9.60146e+06	227385	2.91114e+06	5.3508e+06	1.44133e+07	112542	129783	162699	3.03783e+06	179666	207715	263113	4.72861e+06
Total		1.7023e+07	4.9814e+07	5.50971e+07	7.96376e+07	2.66802e+07	7.78272e+07	8.56007e+07	1.22024e+08	5.46713e+06	2.07461e+07	3.15261e+07	6.44318e+07	8.75922e+06	3.26532e+07	4.98907e+07	9.96102e+07	1.54054e+06	5.65011e+06	6.89527e+06	2.76762e+07	2.30136e+06	9.05741e+06	1.1059e+07	4.34036e+07

## Sheet: Status quo (EEZ)
	Indicator	Landings	Landings Value	Co2-eq
	Units	Tonnes	USD$ (2010)	Tonnes
	Time Series	Av. (2011-2018)	Av. (2011-2018)	Av. (2011-2018)
	Price Co2-eq	Status quo	Status quo	Status quo
EEZ
Albania		5815.25	5.18577e+06	8499.04
Algeria		213698	3.08015e+08	327045
American Samoa		6856.89	3.56423e+07	10515.4
Andaman & Nicobar Isl. (India)		57328.5	7.2169e+07	84222.6
Angola		611064	1.32911e+09	896494
Anguilla (UK)		752.673	6.96886e+06	1090.18
Antigua & Barbuda		2573.58	1.68502e+07	3670.11
Argentina		1.25232e+06	3.52327e+09	1.86372e+06
Aruba (Netherlands)		1394.68	3.29993e+06	2135.7
Ascension Isl. (UK)		3875.39	3.08663e+07	6177.98
Australia		176013	1.1051e+09	267056
Azores Isl. (Portugal)		19591.3	6.48152e+07	29603
Bahamas		14902.4	1.5346e+08	21207.3
Bahrain		33759.4	9.76315e+07	48455.5
Balearic Islands (Spain)		15087.5	5.65552e+07	22099.4
Bangladesh		750507	8.29103e+08	1.14799e+06
Barbados		4061.24	1.9487e+07	5855.81
Belgium		3192.78	1.31449e+07	4730.98
Belize		5592.6	1.89102e+07	7967.19
Benin		61915.8	7.94742e+07	94399.8
Bermuda (UK)		558.148	6.29584e+06	861.541
Bonaire (Netherlands)		228.683	853535	361.758
Bosnia & Herzegovina		8.09967	8329.25	13.2432
Bouvet Isl. (Norway)		109.64	252718	155.982
Brazil (mainland)		616431	1.83695e+09	920492
British Virgin Isl. (UK)		3182.1	2.15296e+07	4560.41
Brunei Darussalam		18067	3.4341e+07	27346.9
Bulgaria		13210.4	2.19278e+07	19570.6
CÃ´te d'Ivoire		132612	2.83691e+08	196098
Cambodia		733039	1.02487e+09	1.11236e+06
Cameroon		200669	2.41132e+08	306666
Canada (Arctic)		38.8079	178718	55.2126
Canada (East Coast)		703653	2.91552e+09	1.04424e+06
Canada (Pacific)		172900	4.90859e+08	257037
Canary Isl. (Spain)		47953.6	1.72906e+08	75294.1
Cape Verde		39015.6	6.48764e+07	59823.7
Cayman Isl. (UK)		365.267	23710.6	519.655
Chagos Archipelago (UK)		772.372	2.88648e+06	1135.44
Channel Isl. (UK)		8930.66	1.62748e+07	13126.2
Chile (mainland)		4.34755e+06	3.47012e+09	6.93637e+06
China		9.92507e+06	3.85025e+10	1.4339e+07
Christmas Isl. (Australia)		1415.09	5.35106e+06	2014.79
Clipperton Isl. (France)		8775.63	5.06708e+07	13821.8
Cocos (Keeling) Isl. (Australia)		4925.93	1.85773e+07	7011.3
Colombia (Caribbean)		5121.49	9.39366e+06	7567.86
Colombia (Pacific)		59792.1	2.68542e+08	95169.9
Comoros Isl.		13864.5	1.86015e+07	21874.9
Congo (ex-Zaire)		18276.1	1.83497e+07	26127.9
Congo, R. of		84146	1.63388e+08	126647
Cook Islands		41267.2	1.76532e+08	64010.7
Corsica (France)		657.034	5.21411e+06	962.321
Costa Rica (Caribbean)		509.528	1.92936e+06	744.316
Costa Rica (Pacific)		33539	1.91911e+08	51660.6
Crete (Greece)		2384.29	1.28929e+07	3516.32
Croatia		80301.6	7.9698e+07	132562
Crozet Isl. (France)		1098.86	5.67154e+06	1584.12
Cuba		21666.9	1.81048e+06	31420.3
CuraÃ§ao (Netherlands)		601.179	2.41895e+06	921.765
Cyprus (North)		14140	2.86552e+07	23012.8
Cyprus (South)		1611.79	1.44762e+07	2418.16
Denmark (Baltic Sea)		81841.1	9.5005e+07	125995
Denmark (North Sea)		141124	2.07133e+08	216692
Desventuradas Isl. (Chile)		42.7251	31106.9	60.8301
Djibouti		3222.37	6.71306e+06	4715.01
Dominica		1172.64	6.84303e+06	1765.44
Dominican Republic		24903.8	5.5399e+07	36053.8
Easter Isl. (Chile)		6163.93	1.7686e+07	9083.46
Ecuador (mainland)		722928	1.14591e+09	1.09124e+06
Egypt (Mediterranean)		66121.8	9.1928e+07	95473.1
Egypt (Red Sea)		48291.1	7.12319e+07	70376.6
El Salvador		16446.5	2.89181e+07	23538.5
Equatorial Guinea		38071.5	8.48702e+07	55264.1
Eritrea		7611.61	7.47932e+06	11022.1
Estonia		71139.7	2.91894e+07	118263
Faeroe Isl. (Denmark)		602762	1.21367e+08	918036
Falkland Isl. (UK)		311834	6.12447e+08	448246
Fernando de Noronha (Brazil)		5352.14	1.40658e+07	8699.13
Fiji		24824.2	1.43231e+08	38667.9
Finland		122234	5.05026e+07	203926
France (Atlantic Coast)		310906	1.11016e+09	477055
France (Mediterranean)		33018.5	1.48516e+08	50181.6
French Guiana		5059.59	1.66909e+07	7224.4
French Polynesia		39465.5	2.02229e+08	60533.8
Gabon		142261	3.78353e+08	213685
Galapagos Isl. (Ecuador)		156281	8.80135e+08	252991
Gambia		194956	2.06205e+08	300693
Gaza Strip		5356.87	205803	7703.19
Georgia		236841	1.69658e+08	398700
Germany (Baltic Sea)		30969.8	3.54355e+07	48691.1
Germany (North Sea)		96023.5	1.59591e+08	145957
Ghana		309665	5.11356e+08	486648
Glorieuse Islands (France)		89.5616	17941.7	129.505
Greece (without Crete)		82655.3	3.48267e+08	126341
Greenland (Denmark)		296776	1.34428e+08	427023
Grenada		2723.56	1.57613e+07	4158.75
Guadeloupe (France)		5918.98	158502	8620.41
Guam (USA)		96.886	612123	147.335
Guatemala (Caribbean)		6149.18	7.08027e+06	9981.3
Guatemala (Pacific)		28330.7	6.99526e+07	40561.6
Guinea		648876	1.17387e+09	952967
Guinea-Bissau		618116	1.04169e+09	887003
Guyana		48554.2	4.31368e+06	69183.9
Haiti		17698.8	3.96547e+07	25757.5
Hawaii Main Islands (USA)		3046.25	1.7126e+07	4468.05
Hawaii Northwest Islands (USA)		639.035	3.06697e+06	935.397
Heard & McDonald Isl. (Australia)		5433.52	3.68113e+07	7731.62
Honduras (Caribbean)		18042.4	1.04263e+08	25683
Honduras (Pacific)		5297.82	1.54914e+07	7580.99
Hong Kong (China)		7659.03	2.89033e+07	10932.3
Howland & Baker Isl. (USA)		13047.7	6.2268e+07	21272.9
HS		2.67452e+06	1.4231e+10	4.23073e+06
Iceland		1.12325e+06	1.40718e+09	1.68569e+06
India (mainland)		3.9176e+06	5.72634e+09	5.81815e+06
Indonesia (Central)		1.78915e+06	2.57175e+09	2.65342e+06
Indonesia (Eastern)		3.90122e+06	6.93968e+09	5.84846e+06
Indonesia (Indian Ocean)		1.64121e+06	2.20027e+09	2.42323e+06
Iran (Persian Gulf)		317455	5.75898e+08	468699
Iran (Sea of Oman)		148259	2.38981e+08	225998
Iraq		11304.7	1.39697e+07	16670.9
Ireland		478504	7.74179e+08	748325
Israel (Mediterranean)		1547.14	8.34794e+06	2275.17
Israel (Red Sea)		50.5	196024	76.5479
Italy (mainland)		185729	9.69396e+08	286907
Jamaica		13370.6	4.36252e+07	19301
Jan Mayen Isl. (Norway)		9505.01	1.21534e+07	14610.3
Japan (Daito Islands)		1869.05	1.21245e+07	3001.79
Japan (main islands)		5.54517e+06	1.74971e+10	8.17126e+06
Japan (Ogasawara Islands)		2471.38	1.53992e+07	3924.69
Jarvis Isl. (USA)		6846.18	2.81649e+07	10846.8
Johnston Atoll (USA)		3521.34	7.17141e+06	5052.47
Jordan		251.62	556940	376.976
Juan Fernandez Islands (Chile)		68858.5	1.22001e+08	107758
Kenya		18034	4.0764e+07	26148.8
Kerguelen Isl. (France)		5929.9	3.17262e+07	8498.53
Kermadec Isl. (New Zealand)		1760.01	8.01317e+06	2590.81
Kiribati (Gilbert Islands)		285084	1.44909e+09	465305
Kiribati (Line Islands)		68855.4	3.19395e+08	108795
Kiribati (Phoenix Islands)		122672	5.90293e+08	199378
Korea (North, Sea of Japan)		173333	1.10206e+09	251495
Korea (North, Yellow Sea)		113667	3.89311e+08	163939
Korea (South)		1.81162e+06	6.74273e+09	2.67593e+06
Kuwait		4831.14	1.22827e+07	6917.55
Latvia		83246.4	4.29972e+07	137102
Lebanon		4923.58	1.1576e+07	7529.22
Liberia		66306	1.50125e+08	95875.5
Libya		44459.2	3.19519e+07	65258.2
Lithuania		24988.4	1.8238e+07	40233.4
Lord Howe Isl. (Australia)		234.545	1.03392e+06	338.243
Macquarie Isl. (Australia)		377.822	2.73908e+06	537.515
Madagascar		117156	2.77019e+08	172591
Madeira Isl. (Portugal)		6817.02	2.63451e+07	10449.8
Malaysia (Peninsula East)		748939	1.19902e+09	1.10093e+06
Malaysia (Peninsula West)		1.03893e+06	2.00388e+09	1.49583e+06
Malaysia (Sabah)		645628	1.23528e+09	941636
Malaysia (Sarawak)		453714	7.47732e+08	678691
Maldives		19824	5.23475e+07	30788.9
Malta		7345.14	2.45952e+07	11043.7
Marshall Isl.		63076.6	3.30941e+08	102520
Martinique (France)		1718.77	1.0102e+06	2644.1
Mauritania		1.38173e+06	1.55552e+09	2.19432e+06
Mauritius		10740.2	3.74665e+07	15663.3
Mayotte (France)		1897.37	4.69603e+06	2907.65
Mexico (Atlantic)		384446	8.44207e+08	554408
Mexico (Pacific)		1.49558e+06	2.39205e+09	2.30501e+06
Micronesia (Federated States of)		164384	8.74217e+08	268227
Montenegro		852.238	1.24915e+06	1326.3
Montserrat (UK)		49.0271	132527	71.6128
Morocco (Central)		944793	1.33801e+09	1.46867e+06
Morocco (Mediterranean)		42168	6.37166e+07	65474
Morocco (South)		1.80192e+06	2.73509e+09	2.74603e+06
Mozambique		146858	2.21936e+08	219255
Mozambique Channel Isl. (France)		37503.2	2.53945e+08	61197.1
Myanmar		1.49583e+06	1.49284e+09	2.20848e+06
Namibia		786688	1.16883e+09	1.17478e+06
Nauru		85720.2	4.34784e+08	140103
Netherlands		102770	2.24859e+08	154624
New Caledonia (France)		5391.46	3.29167e+07	8494.76
New Zealand		519459	8.39039e+08	777137
Nicaragua (Caribbean)		26037.6	6.63251e+07	37046.4
Nicaragua (Pacific)		10785.3	2.98862e+07	15584.7
Nigeria		468397	9.26593e+08	681586
Niue (New Zealand)		1747.13	5.4123e+06	2571.49
Norfolk Isl. (Australia)		477.122	2.84454e+06	720.649
Northern Marianas (USA)		17556.3	4.57645e+07	25184.1
Norway		2.17606e+06	2.9842e+09	3.47144e+06
Oman		281820	5.36082e+08	442950
Oman (Musandam)		23591.2	5.28104e+07	36757.4
Pakistan		663487	6.54741e+08	1.00712e+06
Palau		72138	3.68204e+08	117603
Palmyra Atoll & Kingman Reef (USA)		483.165	1.96898e+06	719.02
Panama (Caribbean)		508.801	2.4746e+06	745.56
Panama (Pacific)		89756.6	1.26187e+08	146403
Papua New Guinea		378728	2.09345e+09	617792
Peru		1.29949e+07	1.5263e+10	2.11947e+07
Philippines		1.79314e+06	2.66738e+09	2.68937e+06
Pitcairn (UK)		1512.43	8.28913e+06	2280.71
Poland		125733	1.36022e+08	200033
Portugal (mainland)		123025	3.6431e+08	187131
Prince Edward Isl. (South Africa)		591.098	1.8858e+06	842.937
Puerto Rico (USA)		1363.84	476741	2013.92
Qatar		19248.2	6.17642e+07	29044
RÃ©union (France)		2167.71	7.74791e+06	3351.62
Romania		4640.11	2.11321e+07	6641.45
Russia (Baltic Sea)		90878	5.00823e+07	147786
Russia (Barents Sea)		284844	3.48198e+08	433812
Russia (Black Sea)		110747	9.31547e+07	181282
Russia (Far East)		5.31527e+06	7.66354e+09	7.59033e+06
Saba and Sint Eustatius (Netherlands)		321.386	746521	457.23
Saint Helena (UK)		384.279	1.47972e+06	577.365
Saint Kitts & Nevis		1057.27	4.13123e+06	1548.88
Saint Lucia		1836.63	7.16643e+06	2776.01
Saint Pierre & Miquelon (France)		1098.56	119835	1644.94
Saint Vincent & the Grenadines		1466.96	6.48667e+06	2155.23
Samoa		6214.87	3.86101e+07	9645.62
Sao Tome & Principe		15866.1	5.74192e+07	24224.2
Sardinia (Italy)		9379.57	6.83536e+07	13708.5
Saudi Arabia (Persian Gulf)		47866.1	1.54163e+08	70638.8
Saudi Arabia (Red Sea)		30344.9	8.34965e+07	45501
Senegal		568111	8.55395e+08	855605
Seychelles		14772.9	5.05005e+07	22077.9
Sicily (Italy)		30847.8	1.90868e+08	45903
Sierra Leone		363944	7.1581e+08	553210
Singapore		964.552	3.83527e+06	1384.84
Sint Maarten (Netherlands)		972.029	6.59445e+06	1500.66
Slovenia		267.003	1.55062e+06	416.696
Solomon Isl.		115930	6.23653e+08	187948
Somalia		120443	1.84697e+08	180029
South Africa (Atlantic and Cape)		570916	7.48171e+08	907244
South Africa (Indian Ocean Coast)		3093.25	1.13981e+07	4563.33
South Georgia & Sandwich Isl. (UK)		50957.2	2.78307e+08	72495.4
South Orkney Islands (UK)		63545.1	2.5718e+08	90403.5
Spain (mainland, Med and Gulf of Cadiz)		151550	5.48119e+08	233834
Spain (Northwest)		178059	4.39113e+08	278823
Sri Lanka		225885	2.58889e+08	326982
St Barthelemy (France)		250.006	58379.7	361.544
St Martin (France)		224.502	52382	324.661
St Paul & Amsterdam Isl. (France)		729.135	3.43432e+06	1067.59
St Paul and St. Peter Archipelago (Brazil)		1111.09	2.9462e+06	1785.16
Sudan		1554.2	4.02516e+06	2211.11
Suriname		56273.2	1.90789e+08	80632.6
Svalbard Isl. (Norway)		347316	5.70584e+08	536445
Sweden (Baltic)		244488	2.55865e+08	399244
Sweden (West Coast)		19957	4.31988e+07	31636.4
Syria		4345.79	5.60779e+06	6563.08
Taiwan		282149	8.89578e+08	412899
Tanzania		113163	2.25298e+08	165903
Thailand (Andaman Sea)		452165	6.97054e+08	669543
Thailand (Gulf of Thailand)		1.19953e+06	1.9814e+09	1.79e+06
Timor Leste		2330.53	480595	3426.38
Togo		51677.6	1.09812e+08	77762.3
Tokelau (New Zealand)		33726.3	1.50098e+08	54443
Tonga		8788.46	2.76569e+07	13169.1
Trindade & Martim Vaz Isl. (Brazil)		11584.4	2.25435e+07	16541.7
Trinidad & Tobago		13143.8	3.28722e+07	19666.2
Tristan da Cunha Isl. (UK)		1181.6	3.07153e+06	1757.8
Tromelin Isl. (France)		784.536	5.43229e+06	1245.73
Tunisia		130567	2.83321e+08	191554
Turkey (Black Sea)		352568	3.93163e+08	565152
Turkey (Marmara Sea)		82524.7	1.14543e+08	128991
Turkey (Mediterranean Sea)		89053.5	2.04261e+08	142046
Turks & Caicos Isl. (UK)		7853.64	3.1936e+08	11188.2
Tuvalu		80722.4	3.99802e+08	131784
Ukraine		62872.6	4.46316e+07	99102.8
United Arab Emirates		44082.4	1.50022e+08	66936.6
United Arab Emirates (Fujairah)		33911	9.37915e+07	52319.6
United Kingdom (UK)		1.55779e+06	2.59348e+09	2.45702e+06
Uruguay		127536	3.54997e+08	185969
US Virgin Isl.		440.937	62400.9	633.458
USA (Alaska, Arctic)		815.918	2.41801e+06	1162.39
USA (Alaska, Subarctic)		2.65022e+06	2.84323e+09	3.81043e+06
USA (East Coast)		1.21998e+06	5.53936e+09	1.79875e+06
USA (Gulf of Mexico)		1.01607e+06	2.06179e+09	1.60129e+06
USA (West Coast)		504123	7.24968e+08	763521
Vanuatu		9176.65	5.52995e+07	14481.9
Venezuela		222251	7.27183e+08	341669
Viet Nam		3.299e+06	7.30538e+09	4.82722e+06
Wake Isl. (USA)		5.63871	21993.1	8.57087
Wallis & Futuna Isl. (France)		2308.17	1.3389e+07	3686.76
Yemen (Arabian Sea)		396674	4.06357e+08	599235
Yemen (Red Sea)		27796.8	3.57744e+07	42534.1
Total		1.05869e+08	2.22485e+11	1.60584e+08

## Sheet: Mechanism (EEZ)
	Indicator	Landings removals				Ad. Co2-eq seq.	Ad. Co2-eq seq.	Ad. Co2-eq seq.	Ad. Co2-eq seq.
	Units	tonnes	tonnes	tonnes	tonnes	tonnes	tonnes	tonnes	tonnes
	Factor	0.14	0.14	0.14	0.14	0.14	0.14	0.14	0.14
	Price Co2-eq	66	165	203	543	66	165	203	543
EEZ
Albania		774.65	4908.95	4938.09	5120.63	1315.09	7196.9	7241.27	7502.82
Algeria		62900.7	86542.9	90947.5	167693	99616.3	134884	141453	258430
American Samoa		70.7307	2117.8	2161.31	3783.56	100.761	3014.1	3078.03	5489.83
Andaman & Nicobar Isl. (India)		55.7826	10447.2	10464.4	38671	80.5468	15883.1	15907.6	57174.4
Angola		13543.8	257781	269927	443096	21309	381245	399146	650398
Anguilla (UK)		0	0.0267611	0.0267611	6.17188	0	0.0380721	0.0380721	10.3771
Antigua & Barbuda		0	0.0464826	0.0464826	0.0657643	0	0.0661293	0.0661293	0.0935607
Argentina		2237.36	654839	817143	899490	3204.2	1.00215e+06	1.24322e+06	1.36081e+06
Aruba (Netherlands)		372.833	679.844	720.984	1116.9	530.427	1026.51	1092.05	1709.62
Ascension Isl. (UK)		43.7132	415.973	520.713	1018.1	66.6785	606.215	755.225	1513.81
Australia		321.397	49354.9	51641.2	93355	488.901	81369.1	84671.6	145703
Azores Isl. (Portugal)		6466.98	9712.28	9733.19	14071.9	9484.45	14162.7	14193	20699.9
Bahamas		1105.46	1105.46	1105.46	1105.49	1572.7	1572.7	1572.7	1572.74
Bahrain		9.38273e-05	222.131	223.377	1555.27	0.000133485	321.462	323.234	2518.26
Balearic Islands (Spain)		202.235	1003.95	1666.32	12748.2	304.855	1562.02	2655.47	18680.6
Bangladesh		9068.96	113305	183498	466106	14694.9	163722	280481	741648
Barbados		44.2431	73.9092	75.0163	1321.59	62.9435	105.162	106.752	1882.53
Belgium		678.618	1160.7	1509.08	2284	1124.73	1828.06	2326.5	3437.84
Belize		0	459.438	621.062	650.819	0	653.626	883.565	925.898
Benin		202.419	3032.92	4210.06	30836	328.951	4457.07	6402.79	49174.4
Bermuda (UK)		0.0376923	4.21201	4.21201	5.73636	0.0536236	6.12182	6.12182	8.34575
Bonaire (Netherlands)		96.4068	102.91	105.785	140.329	147.317	156.677	161.353	217.67
Bosnia & Herzegovina		0	0	0	5.83743	0	0	0	9.85567
Bouvet Isl. (Norway)		0.0134218	28.1158	28.1165	109.64	0.0190948	39.9996	40.0006	155.982
Brazil (mainland)		7890.81	133479	149140	306647	13244	213710	236819	468805
British Virgin Isl. (UK)		4.15625	4.42808	4.43623	13.4793	5.91296	6.35556	6.36889	21.4095
Brunei Darussalam		362.948	5630.52	5952.39	10823.8	610.05	8213.26	8671.24	16595.5
Bulgaria		2805.45	10951.7	11305.3	12069	4680.14	16298.5	16805.1	17924.4
CÃ´te d'Ivoire		2474.12	20424.5	21201.3	91579.4	4114.31	30440.4	31644	135631
Cambodia		172529	511170	636848	699412	274835	795930	974817	1.06435e+06
Cameroon		4270.24	12296.2	14761.1	109216	7059.77	18533	22044.5	175577
Canada (Arctic)		0	4.23352e-05	4.23352e-05	0.00405758	0	6.02288e-05	6.02288e-05	0.00577259
Canada (East Coast)		107103	171718	215312	421932	172584	268236	340742	640791
Canada (Pacific)		18754.1	43031.2	44254.4	162487	26737.8	62804.8	64545.1	242223
Canary Isl. (Spain)		22.7543	19603.9	19722.1	26204	35.8183	29587.1	29770.8	40118.5
Cape Verde		14417.7	28751	28774.6	35745.9	23061.4	43560.2	43594.6	54741.3
Cayman Isl. (UK)		364.267	364.267	364.267	364.267	518.23	518.23	518.23	518.23
Chagos Archipelago (UK)		3.61773	76.1206	88.3539	596.527	5.14683	108.438	125.841	849.769
Channel Isl. (UK)		4352.47	5608.61	5829.22	8252.24	6302.68	8291.91	8627.72	12144.5
Chile (mainland)		1.54502e+06	2.73062e+06	2.99014e+06	3.54758e+06	2.59794e+06	4.4974e+06	4.88846e+06	5.7296e+06
China		77033.6	779027	1.22882e+06	5.1436e+06	124690	1.1585e+06	1.80327e+06	7.46887e+06
Christmas Isl. (Australia)		11.9573	12.466	12.6233	1413.46	18.2571	18.9809	19.2046	2012.12
Clipperton Isl. (France)		37.5208	1980.66	1994.95	3305.63	60.0272	2825.51	2847.32	4876.56
Cocos (Keeling) Isl. (Australia)		22.7672	23.6031	25.1933	4907.77	32.5039	33.693	35.9554	6982.34
Colombia (Caribbean)		228.149	1186.33	1273.2	2635.53	340.019	1767.3	1890.95	3894.87
Colombia (Pacific)		6219.02	18647.1	20594.6	35606.2	9825.06	29264	32361.3	55804
Comoros Isl.		66.7774	86.173	87.5813	3714.62	95.0024	122.596	124.745	5815.28
Congo (ex-Zaire)		9773.31	11030.9	11045.1	18213	14013.3	15804.5	15824.6	26030.7
Congo, R. of		3494.81	11108.4	11482.5	68779.2	5863.3	17614.4	18160.9	104575
Cook Islands		1969.59	12196.4	12462.8	29329.2	3159.37	17740.2	18152.6	44495.9
Corsica (France)		2.75209	33.3465	43.0847	205.401	4.19009	51.9817	67.0645	305.097
Costa Rica (Caribbean)		1.9676	2.23201	2.23201	2.62632	2.79926	3.17544	3.17544	3.74153
Costa Rica (Pacific)		742.077	2569.96	2637.76	10181.8	1230.13	3832.11	3928.57	15082
Crete (Greece)		0.0885939	103.06	192.998	940.921	0.147804	162.521	302.07	1398.66
Croatia		46951.3	72347.6	72489.1	77487	79607.1	120414	120637	128331
Crozet Isl. (France)		1.27367e-08	63.3383	111.708	700.015	1.812e-08	99.0488	174.694	1016.44
Cuba		15174.5	21604.3	21604.3	21639.9	22183.9	31331.3	31331.3	31381.9
CuraÃ§ao (Netherlands)		7.77714	8.75995	9.33002	93.8295	11.0643	12.5738	13.5059	138.693
Cyprus (North)		6.01774	10168.5	10238.9	13989.4	8.58684	16547.7	16662.8	22788.3
Cyprus (South)		0.944554	6.2077	11.1202	187.732	1.56158	10.121	18.1445	274.839
Denmark (Baltic Sea)		45271.9	59676	64924.8	77257.5	70369.3	92309.2	100377	119271
Denmark (North Sea)		42776.6	98487.8	106840	123761	70446.5	152650	164792	190954
Desventuradas Isl. (Chile)		15.7875	42.2197	42.2409	42.5708	22.4604	60.0801	60.1135	60.6084
Djibouti		303.317	607.846	692.162	891.03	444.665	899.636	1019.59	1302.51
Dominica		9.11612	15.7212	19.9748	120.697	12.9712	22.5144	28.7443	177.93
Dominican Republic		90.5662	90.5662	90.5662	2227.16	128.846	128.846	128.846	3203.97
Easter Isl. (Chile)		81.3202	1001.93	1114.76	5584.94	132.973	1593.57	1769.5	8189.92
Ecuador (mainland)		56109.6	376467	381869	428876	94430.8	588064	596203	664646
Egypt (Mediterranean)		6275.19	16312	18637	46934.4	9041.7	23579.1	26934.9	67503.1
Egypt (Red Sea)		10839.1	16665.4	17302	33800.3	16238.6	24734.7	25642.1	49685.4
El Salvador		0.0903836	1200.58	1593.06	3927.31	0.128619	1757.6	2315.97	5636.82
Equatorial Guinea		51.737	14911.6	16676.2	31714	81.2954	21277.5	23797.7	45523.3
Eritrea		3959.39	6771.32	6772.5	6836.77	5821.18	9822.31	9823.99	9915.43
Estonia		59664.2	65980.9	69176.3	70783.3	99446	109915	115245	117754
Faeroe Isl. (Denmark)		564575	581485	601089	602232	861753	887576	915540	917280
Falkland Isl. (UK)		71645.6	123658	159201	294312	103237	177390	229832	423253
Fernando de Noronha (Brazil)		15.6956	291.008	1732.31	5292.89	22.3358	445.81	2802.39	8611.57
Fiji		274.117	641.806	847.97	2541.28	413.47	959.411	1272.21	3931.27
Finland		97246.6	116214	118257	121510	162683	194456	197857	202894
France (Atlantic Coast)		31127.8	90941.8	105616	185897	50642.5	147872	171469	291792
France (Mediterranean)		131.688	4606.82	7350.82	13139.1	202.073	7242.79	11793.5	20763
French Guiana		2589.81	2626.18	2901.49	3806.28	3686.9	3738.66	4131.06	5419.13
French Polynesia		7217.74	10102.1	10497.4	21410.2	10446.2	14564	15146.1	31041.7
Gabon		5055.07	36562.3	38513.4	117273	8390.73	54792	57584.3	176076
Galapagos Isl. (Ecuador)		513.099	6507.5	6550.23	97534.8	730.414	9286.89	9349.53	157198
Gambia		55504.3	82368.2	107868	167577	93198.8	131740	172199	261606
Gaza Strip		4997.95	5356.87	5356.87	5356.87	7192.33	7703.19	7703.19	7703.19
Georgia		128330	233925	233948	235728	216385	394394	394427	397078
Germany (Baltic Sea)		16401.1	22703	24041	29100.3	26568	36121.4	38144.9	45987.6
Germany (North Sea)		34536	71683.6	76381.1	86419	57059.3	111096	117877	132293
Ghana		12829.5	55752.5	63245.8	169362	21451.7	87745.7	99891.2	274166
Glorieuse Islands (France)		75.6798	88.431	88.4595	89.2069	109.446	127.682	127.722	128.926
Greece (without Crete)		30.4505	10600.2	16816.5	37375.9	45.2106	17349.1	27631.8	59728.6
Greenland (Denmark)		239107	277240	277859	290710	344494	398768	399683	418392
Grenada		196.066	222.99	272.62	446.824	278.937	317.306	388.432	645.571
Guadeloupe (France)		5918.76	5918.79	5918.79	5918.81	8620.06	8620.1	8620.1	8620.15
Guam (USA)		1.63206	14.9856	16.9947	32.8538	2.34183	21.3395	24.2877	47.3247
Guatemala (Caribbean)		0	139.99	208.403	5399.43	0	199.159	296.488	8914.65
Guatemala (Pacific)		0.122537	3257.72	3368.4	5782.94	0.177921	4634.7	4792.15	8227.47
Guinea		69991.7	231865	265808	588310	105277	336709	387778	866148
Guinea-Bissau		42170.2	345458	401342	603395	63802.4	496489	576236	865818
Guyana		48429	48436.2	48448.4	48473	68989.2	68999.4	69019.4	69054.4
Haiti		247.358	303.282	358.933	476.811	351.908	431.472	522.469	713.828
Hawaii Main Islands (USA)		1.53731	423.699	477.493	1467.38	2.19169	602.788	679.318	2099.86
Hawaii Northwest Islands (USA)		0.246758	128.373	129.768	380.708	0.351055	182.632	184.617	545.468
Heard & McDonald Isl. (Australia)		0	28.8259	147.649	987.617	0	41.0594	210.25	1406.59
Honduras (Caribbean)		6.31956	749.64	881.138	1508.07	8.99062	1066.49	1253.57	2145.49
Honduras (Pacific)		1.93737e-09	3.71229e-06	3.71229e-06	6.11227e-06	3.04038e-09	5.28163e-06	5.28163e-06	8.696e-06
Hong Kong (China)		0	401.03	1846.87	3316.78	0	577.123	2640.26	4741.09
Howland & Baker Isl. (USA)		937.991	1109.07	1132.83	10630.3	1531.82	1775.35	1809.87	17320.2
HS		132115	526687	561382	1.60643e+06	204147	778349	828945	2.50524e+06
Iceland		434637	737925	951717	1.08627e+06	639002	1.09952e+06	1.42729e+06	1.63066e+06
India (mainland)		1.13249e+06	2.13919e+06	2.37846e+06	3.28933e+06	1.77097e+06	3.23743e+06	3.58616e+06	4.91606e+06
Indonesia (Central)		215111	899666	1.06376e+06	1.38071e+06	335814	1.36261e+06	1.60492e+06	2.06086e+06
Indonesia (Eastern)		521611	1.97289e+06	2.29992e+06	3.05116e+06	814367	3.0013e+06	3.47635e+06	4.59147e+06
Indonesia (Indian Ocean)		174439	848963	953839	1.26566e+06	265755	1.27474e+06	1.4291e+06	1.88013e+06
Iran (Persian Gulf)		4185.46	30728.4	39529.6	103887	6517.1	44964.8	58381.1	154588
Iran (Sea of Oman)		3290.42	11728.5	15892.4	56885.5	5050.62	17375.2	23949.8	90307.4
Iraq		1109.3	5515.23	6505.43	8258.1	1617.53	7906	9524.37	12256.7
Ireland		233062	333626	359634	429781	364637	528358	568257	675493
Israel (Mediterranean)		15.7515	51.2526	51.2526	464.104	22.4155	78.5733	78.5733	675.351
Israel (Red Sea)		0	0	0	0	0	0	0	0
Italy (mainland)		1.04206	28174.6	50770.9	98251.7	1.503	47506.1	85035.4	159550
Jamaica		0.0597682	0.0650478	0.0650478	727.065	0.0850302	0.0925413	0.0925413	1223.62
Jan Mayen Isl. (Norway)		394.213	9212.68	9283.28	9502.04	611.899	14170.1	14271.6	14606.1
Japan (Daito Islands)		11.2081	84.9207	112.665	899.562	15.9454	120.814	160.285	1423.88
Japan (main islands)		128341	1.45222e+06	1.68407e+06	3.98461e+06	197894	2.1938e+06	2.52801e+06	5.87772e+06
Japan (Ogasawara Islands)		11.8331	76.9146	104.348	876.322	16.8346	109.424	148.453	1394.84
Jarvis Isl. (USA)		4.63096	1357.43	1375.19	5903.18	6.58832	1931.45	1957.77	9306.09
Johnston Atoll (USA)		38.2387	2189.76	2204.38	3368.56	61.8561	3123.6	3146.06	4802.88
Jordan		0	0	0	2.92578	0	0	0	4.5958
Juan Fernandez Islands (Chile)		0	43815.6	51457.6	67262.8	0	68761.3	80754.2	105481
Kenya		57.1132	546.146	674.331	2002.93	86.1889	810.616	997.096	2945.53
Kerguelen Isl. (France)		0	450.269	546.894	3354.02	0	661.427	812.426	4833.92
Kermadec Isl. (New Zealand)		0.936359	42.3743	276.209	1289.23	1.33355	68.3693	434.381	1892.68
Kiribati (Gilbert Islands)		24892.3	26944.8	27095	199538	40108.2	43325.4	43542.2	325421
Kiribati (Line Islands)		4665.07	15100.1	15348.1	51677	7521.4	22386.9	22751.4	80727.1
Kiribati (Phoenix Islands)		8129.84	12122.3	12199	97014.9	13280.2	19055.4	19169	157427
Korea (North, Sea of Japan)		642.744	13011.2	13873.5	55152.7	966.09	19695.3	20959.6	81268.9
Korea (North, Yellow Sea)		789.561	7702.88	8504.93	50842.1	1233.66	11492.4	12694.9	73378
Korea (South)		16055.4	337489	380792	1.18825e+06	25689.5	535144	600241	1.76313e+06
Kuwait		17.375	194.119	199.406	1325.45	27.2672	278.715	286.236	1888.22
Latvia		65323.2	73563.4	78637.5	82744.6	108256	121584	129825	136333
Lebanon		8.60347	8.98612	9.02514	959.11	12.2399	12.8632	12.9271	1610.74
Liberia		1317.69	21060.5	26460.4	45925.4	1973.77	30214.1	37941.9	66318.5
Libya		22170.8	31587.9	32090.6	42318.2	32733.3	46477	47275.3	62073.8
Lithuania		17817.8	21200.8	23777.1	24654.4	29098.2	34361.3	38386.8	39723.8
Lord Howe Isl. (Australia)		0.299402	3.50217	7.09261	182.457	0.425949	4.98302	10.3421	261.419
Macquarie Isl. (Australia)		0	0	0	0	0	0	0	0
Madagascar		358.309	16327.8	17371.8	52310.1	510.206	23923.4	25607.4	77171
Madeira Isl. (Portugal)		2966.05	3905.01	3906.31	4587.65	4377.48	5723.17	5725.37	6808.07
Malaysia (Peninsula East)		96809.2	436933	505047	631953	149089	654255	751223	932161
Malaysia (Peninsula West)		32493.5	520180	580677	816053	50142.1	756527	842626	1.17795e+06
Malaysia (Sabah)		67908	252482	314471	463840	104421	377529	466236	679951
Malaysia (Sarawak)		82270.1	254033	312866	387066	130910	391468	475228	581480
Maldives		1408.45	3444.39	3648.17	6974.28	2358.19	5521.09	5819.98	10809.8
Malta		94.3659	3013.9	3417.54	5545.5	145.081	4540.54	5188.95	8426.74
Marshall Isl.		5415.93	6413.55	6550.65	43639.7	8555.85	10036.5	10237.4	70743
Martinique (France)		1536.1	1605.41	1605.41	1605.87	2360.72	2459.37	2459.37	2460.08
Mauritania		396920	828134	875391	1.28096e+06	653443	1.32638e+06	1.3955e+06	2.04674e+06
Mauritius		99.9759	942.879	988.2	5359.84	142.691	1368.01	1434.53	7694.18
Mayotte (France)		1055.74	1120.57	1120.61	1133.13	1557.31	1649.54	1649.6	1668.33
Mexico (Atlantic)		697.62	18654.1	21093.9	55419.2	992.988	27473.7	31128.5	80071.2
Mexico (Pacific)		480160	715222	717885	841030	799868	1.17865e+06	1.18244e+06	1.35958e+06
Micronesia (Federated States of)		9626.72	11525.9	11710.7	105041	15632.5	18545.7	18816.8	171203
Montenegro		274.112	569.24	623.249	785.359	460.069	896.862	976.779	1224.48
Montserrat (UK)		0	0.000896037	0.000896037	0.0528964	0	0.00127476	0.00127476	0.085181
Morocco (Central)		502900	581806	596775	887525	829652	951067	972889	1.38713e+06
Morocco (Mediterranean)		12850.3	20780	22027	33951	21222.9	33193.3	35121.8	53390.1
Morocco (South)		783189	1.07331e+06	1.09527e+06	1.71957e+06	1.27337e+06	1.70643e+06	1.73878e+06	2.62855e+06
Mozambique		1618.79	9787.18	11274.2	60683.6	2303.08	15233.8	17724.8	93793.1
Mozambique Channel Isl. (France)		20.4681	317.029	331.749	18412.8	29.3233	453.929	475.227	29979.8
Myanmar		554676	1.056e+06	1.13705e+06	1.38828e+06	833589	1.57097e+06	1.68898e+06	2.0523e+06
Namibia		195257	454799	497412	783632	308581	701986	762639	1.17007e+06
Nauru		5891.51	6576.01	6608.16	61817.3	9619.6	10707.5	10753.8	101015
Netherlands		29245.6	70453.2	77517.5	91194.3	48256.5	108292	118467	138152
New Caledonia (France)		1297.98	1467.25	1534.79	1857.97	1905.62	2146.43	2242.51	2719.97
New Zealand		155491	265569	290724	463018	236514	398356	434819	694952
Nicaragua (Caribbean)		4.86941	2176.58	3445.82	5926.13	6.92757	3097.89	4903.61	8432.29
Nicaragua (Pacific)		307.011	1728.39	1968.41	5624.06	465.311	2498.15	2853.52	8087.81
Nigeria		8690.05	52537.9	55285.2	205814	13612.6	76341.2	80267.2	307343
Niue (New Zealand)		15.3306	995.566	1006.21	1382.23	22.3954	1418.42	1435.16	1974.87
Norfolk Isl. (Australia)		8.4676	17.6994	20.1533	268.175	12.1189	25.2571	28.8692	383.717
Northern Marianas (USA)		5.06906	437.533	475.052	16977.6	7.21158	700.121	754.731	24247.4
Norway		351945	1.53255e+06	1.70646e+06	1.98328e+06	550591	2.47085e+06	2.74203e+06	3.1719e+06
Oman		2147.16	3537.6	4096.64	114985	3054.7	5096.21	6033.38	192482
Oman (Musandam)		361.724	455.215	466.544	3762.47	514.613	665.825	684.606	6192.15
Pakistan		68481.9	262042	301383	555876	101777	386961	450111	849271
Palau		6373.01	7386.75	7451.73	50388.6	10261.4	11815.1	11907.7	82044.7
Palmyra Atoll & Kingman Reef (USA)		0.053919	4.99441	14.484	416.426	0.0767088	7.42008	22.128	610.123
Panama (Caribbean)		2.50486	72.1434	87.4398	260.701	3.57116	102.645	127.6	384.696
Panama (Pacific)		23732.9	72737.7	73997	74873.9	39938.8	121586	123377	124637
Papua New Guinea		24181.5	27670.1	27984.3	212143	38546.5	44042.8	44500.6	345383
Peru		728015	1.01279e+07	1.02562e+07	1.0666e+07	1.20772e+06	1.68637e+07	1.70572e+07	1.76986e+07
Philippines		124298	1.10423e+06	1.14177e+06	1.32396e+06	201803	1.65107e+06	1.70527e+06	1.98296e+06
Pitcairn (UK)		2.48084	56.7898	79.2348	817.718	3.52971	80.811	112.744	1165.38
Poland		69744.9	84071.1	96796.3	116904	113533	135928	155992	186940
Portugal (mainland)		1231.15	21266.8	29685.7	70820.4	1939.26	33894	47477.6	108591
Prince Edward Isl. (South Africa)		0.00893782	9.67668	27.9713	571.316	0.0146163	13.7686	39.8277	813.623
Puerto Rico (USA)		1177.81	1314.1	1314.1	1314.1	1738.68	1932.58	1932.58	1932.58
Qatar		0.00102341	983.832	989.51	4666	0.00145597	1470.26	1478.34	7491.04
RÃ©union (France)		572.646	772.843	776.744	1807.18	846.044	1146.35	1151.9	2765.29
Romania		0.09375	2.42948	2.46073	4019.05	0.141625	3.46744	3.51603	5725.94
Russia (Baltic Sea)		69504.3	79704.7	86611.8	89964.3	114428	130109	141206	146417
Russia (Barents Sea)		40302.7	260870	265881	284408	59797.1	398155	405309	433173
Russia (Black Sea)		68222.9	94332.6	94505.6	97020.3	114532	157773	158056	161721
Russia (Far East)		1.6078e+06	3.1991e+06	3.31683e+06	4.2928e+06	2.28892e+06	4.57572e+06	4.74326e+06	6.13499e+06
Saba and Sint Eustatius (Netherlands)		48.1574	149.95	149.95	256.415	68.5119	213.329	213.329	364.793
Saint Helena (UK)		164.73	176.777	202.785	217.539	238.063	255.214	292.215	313.781
Saint Kitts & Nevis		0.0900736	0.623765	0.623765	21.6914	0.128145	0.99769	0.99769	31.7318
Saint Lucia		11.098	118.93	137.009	550.618	15.7901	186.543	212.264	846.357
Saint Pierre & Miquelon (France)		1040.45	1072.34	1072.49	1075.07	1562.14	1607.55	1607.79	1611.49
Saint Vincent & the Grenadines		72.3841	108.97	120.959	234.657	102.995	155.971	173.984	336.923
Samoa		89.3804	1346.32	1375.02	2180.34	140.109	1934.94	1980.13	3205.57
Sao Tome & Principe		323.829	2708.58	2721.22	6523.9	470.275	3930.35	3951	10013.6
Sardinia (Italy)		0.091916	296.384	480.094	1969.88	0.136062	470.194	758.108	2932.42
Saudi Arabia (Persian Gulf)		0.463219	379.086	437.817	2451.8	0.659007	551.068	645.513	3828.93
Saudi Arabia (Red Sea)		18.6312	4982.6	5342.68	8305.89	30.0952	7936.29	8468.93	12763.6
Senegal		82280.8	169816	181096	345861	127856	254787	271327	534320
Seychelles		149.341	528.175	678.966	3758.09	212.625	754.17	971.355	5426.15
Sicily (Italy)		3.08084	524.254	2735.33	10367.4	4.9329	829.829	4516.78	16169.8
Sierra Leone		2251.92	18932.2	38991.6	249674	3399.74	27612.4	60352.7	388638
Singapore		0	0.00140732	0.0114123	0.0135678	0	0.00200214	0.0162359	0.0193558
Sint Maarten (Netherlands)		2.92573	20.0582	20.8296	366.172	4.16236	31.8343	32.9391	570.211
Slovenia		0.001625	60.1711	61.2011	132.138	0.00250983	101.692	103.408	216.483
Solomon Isl.		11111.6	12916	13206.8	68405.6	17003.5	19702.1	20140.9	110241
Somalia		43315.3	86879.8	97978.3	110005	64257.9	130021	146537	163994
South Africa (Atlantic and Cape)		165939	445820	482398	527894	278364	726944	778982	843798
South Africa (Indian Ocean Coast)		57.248	701.391	785.486	1271.41	81.4783	997.879	1117.68	1824.56
South Georgia & Sandwich Isl. (UK)		7834.09	7891.23	8103.58	18261	11145.3	11226.6	11529	25979.7
South Orkney Islands (UK)		28429.1	28508.2	28811	33029.4	40445.2	40557.6	40988.4	46989.8
Spain (mainland, Med and Gulf of Cadiz)		4101.98	38753.8	58244	115091	6780.91	63227.1	95896.9	181321
Spain (Northwest)		12252	93475.2	104872	151620	19949.1	150117	168891	239869
Sri Lanka		13941	43538.1	44912.1	211229	21315	63757.6	65712.5	305287
St Barthelemy (France)		187.491	237.5	237.5	237.501	269.947	341.093	341.093	341.094
St Martin (France)		168.377	213.275	213.275	213.276	242.426	306.302	306.302	306.302
St Paul & Amsterdam Isl. (France)		0.728468	10.2807	10.3368	610.037	1.03637	14.6314	14.7112	872.916
St Paul and St. Peter Archipelago (Brazil)		2.10479	259.775	298.417	1056.16	3.00356	413.398	471.53	1700.34
Sudan		0	79.4118	79.4118	79.4118	0	112.976	112.976	112.976
Suriname		73.2003	563.799	694.671	3641.1	110.038	808.037	1021.94	5256.36
Svalbard Isl. (Norway)		23754	225114	254744	347268	38468.3	346865	392844	536376
Sweden (Baltic)		167670	201695	210877	226929	278565	334212	348471	373458
Sweden (West Coast)		6670.31	13499.4	14889.5	17725	10983.5	22060.9	24117.2	28416.8
Syria		462.552	1532.45	1803.56	2817.3	710.273	2311.32	2722.4	4257.08
Taiwan		2568.21	12588.4	26794.1	219395	3907.92	19200.1	39438.9	320067
Tanzania		1704.12	1725.54	1788.08	32587.2	2424.39	2454.89	2560	49102.4
Thailand (Andaman Sea)		38304.7	164106	204873	304203	60893.7	247985	305998	451907
Thailand (Gulf of Thailand)		173543	551479	685748	930786	275893	843935	1.03502e+06	1.39443e+06
Timor Leste		2208.42	2265.86	2265.91	2305.55	3238.93	3320.64	3320.71	3385.54
Togo		238.075	5531.56	6365.5	41943.7	379.455	8081.14	9366.06	62805.5
Tokelau (New Zealand)		2516.84	4765.69	4809.96	27529.5	4108.2	7341.39	7408.23	44315
Tonga		2740.78	5056.31	5095.29	6153.85	3956.84	7256.08	7315.91	8863.38
Trindade & Martim Vaz Isl. (Brazil)		2.36866	3729.11	7983.76	11260.7	3.36982	5306.29	11359.5	16030.3
Trinidad & Tobago		145.36	1189.34	1550.37	4591.55	211.344	1732.79	2288.33	6802.02
Tristan da Cunha Isl. (UK)		594.023	599.838	686.061	976.357	845.097	853.423	976.091	1423.38
Tromelin Isl. (France)		14.6611	86.6438	88.3158	198.099	20.8579	123.266	125.644	288.183
Tunisia		17207.8	55093.5	63311.5	91560.5	24773.8	80311	92561.1	134125
Turkey (Black Sea)		152560	263004	263250	320531	246521	430289	430639	518427
Turkey (Marmara Sea)		7259.78	39795.7	40446.8	66864.1	12241.8	66962.6	67889.2	106601
Turkey (Mediterranean Sea)		3647.24	49031.2	51764.1	71223.2	6131.56	81359.9	85354.9	115877
Turks & Caicos Isl. (UK)		0.0407275	3.7817	25.2358	44.9743	0.0579416	5.3801	35.9089	63.9902
Tuvalu		5791.68	6528.24	6638.63	60250.2	9404.32	10536.4	10698.4	98310.3
Ukraine		39367.5	58302.6	58405.3	61438.5	62600.6	92390.9	92537	97011.2
United Arab Emirates		83.8896	852.172	858.471	3833.37	119.347	1298.7	1307.72	6179.92
United Arab Emirates (Fujairah)		0.00103338	80.314	81.6268	1722.9	0.00147016	131.302	133.17	2886.51
United Kingdom (UK)		501284	1.10076e+06	1.1877e+06	1.41155e+06	806294	1.77624e+06	1.90985e+06	2.24198e+06
Uruguay		72.4882	25568.3	36693.4	102328	103.422	36958.4	52832.8	149817
US Virgin Isl.		354.067	431.651	431.652	431.906	507.942	618.327	618.329	618.728
USA (Alaska, Arctic)		0	0	2.14712	13.9427	0	0	3.05463	19.8359
USA (Alaska, Subarctic)		1.38224e+06	1.86965e+06	2.06484e+06	2.42119e+06	1.98551e+06	2.67893e+06	2.95662e+06	3.4846e+06
USA (East Coast)		193051	287344	387306	620164	323594	461033	604790	940846
USA (Gulf of Mexico)		778.301	685024	687053	836944	1303.23	1.12924e+06	1.13217e+06	1.34556e+06
USA (West Coast)		251237	291592	312159	380168	397780	456213	487188	584627
Vanuatu		771.101	2311.02	2445.74	3373.67	1116.36	3321.06	3533.37	4997.27
Venezuela		289.231	1170.23	1563.51	14040.9	421.885	1749.43	2362.63	23115.2
Viet Nam		101180	894363	1.51525e+06	2.55395e+06	169202	1.36406e+06	2.25161e+06	3.75183e+06
Wake Isl. (USA)		0.00244166	2.17037	2.55311	3.93213	0.00347366	3.10406	3.68125	5.85672
Wallis & Futuna Isl. (France)		159.403	332.984	346.259	1328.3	235.679	483.453	503.138	2085.11
Yemen (Arabian Sea)		310.804	1302.16	1420.37	201632	522.42	1950.65	2121.05	297681
Yemen (Red Sea)		67.9544	2656.38	2837.05	11845.9	96.6764	3779.14	4036.17	18394.5
Total		1.7023e+07	4.9814e+07	5.50971e+07	7.96376e+07	2.66802e+07	7.78272e+07	8.56007e+07	1.22024e+08
